# Supplementary material for: Sex Differences in the Utilization and Outcomes of Cardiac Valve Replacement Surgery for Infective Endocarditis: Insights From the National Inpatient Sample
Source: PubMed Central journal article supplement — J Am Heart Assoc. 2021 Oct 11;10(20):e020095. doi: 10.1161/JAHA.120.020095 (PMC8751869; doi:10.1161/jaha.120.020095), 2021-10-11

# **SUPPLEMENTAL MATERIAL**

**Table S1. Year wise utilization of cardiac valve replacement surgery in hospitalizations stratified by sex.**

| <b>Year</b> | <b>Cardiac valve replacement in females</b> | <b>No cardiac valve replacement in females</b> | <b>Cardiac valve replacement in males</b> | <b>No cardiac valve replacement in males</b> |
|-------------|---------------------------------------------|------------------------------------------------|-------------------------------------------|----------------------------------------------|
| 2004        | 963                                         | 14205                                          | 2072                                      | 15547                                        |
| 2005        | 858                                         | 13367                                          | 1967                                      | 16089                                        |
| 2006        | 960                                         | 15209                                          | 2182                                      | 16428                                        |
| 2007        | 802                                         | 14604                                          | 1860                                      | 15758                                        |
| 2008        | 1098                                        | 16294                                          | 2339                                      | 17724                                        |
| 2009        | 1201                                        | 15489                                          | 2382                                      | 17520                                        |
| 2010        | 972                                         | 14334                                          | 2226                                      | 17484                                        |
| 2011        | 1000                                        | 15621                                          | 2401                                      | 18387                                        |
| 2012        | 1210                                        | 12764                                          | 2455                                      | 16365                                        |
| 2013        | 1250                                        | 12925                                          | 2620                                      | 17115                                        |
| 2014        | 1155                                        | 12495                                          | 2765                                      | 16585                                        |
| 2015 Sep    | 1000                                        | 9815                                           | 2150                                      | 13265                                        |

**Table S2. Year wise utilization of aortic valve replacement in hospitalizations stratified by sex.**

| <b>Year</b> | <b>Aortic valve replacement in females</b> | <b>No aortic valve replacement in females</b> | <b>Aortic valve replacement in males</b> | <b>No aortic valve replacement in males</b> |
|-------------|--------------------------------------------|-----------------------------------------------|------------------------------------------|---------------------------------------------|
| 2004        | 437                                        | 14732                                         | 1388                                     | 16231                                       |
| 2005        | 358                                        | 13868                                         | 1329                                     | 16727                                       |
| 2006        | 445                                        | 15724                                         | 1538                                     | 17071                                       |
| 2007        | 370                                        | 15036                                         | 1350                                     | 16270                                       |
| 2008        | 562                                        | 16830                                         | 1698                                     | 18365                                       |
| 2009        | 605                                        | 16085                                         | 1699                                     | 18203                                       |
| 2010        | 454                                        | 14852                                         | 1564                                     | 18147                                       |
| 2011        | 533                                        | 16088                                         | 1722                                     | 19067                                       |
| 2012        | 590                                        | 13385                                         | 1645                                     | 17175                                       |
| 2013        | 605                                        | 13570                                         | 1830                                     | 17905                                       |
| 2014        | 560                                        | 13090                                         | 1880                                     | 17470                                       |
| 2015 Sep    | 445                                        | 10370                                         | 1470                                     | 13945                                       |

**Table S3. Year wise utilization of mitral valve replacement in hospitalizations stratified by sex.**

| <b>Year</b> | <b>Mitral valve replacement in females</b> | <b>No mitral valve replacement in females</b> | <b>Mitral valve replacement in males</b> | <b>No mitral valve replacement in males</b> |
|-------------|--------------------------------------------|-----------------------------------------------|------------------------------------------|---------------------------------------------|
| 2004        | 644                                        | 14524                                         | 965                                      | 16654                                       |
| 2005        | 614                                        | 13611                                         | 888                                      | 17169                                       |
| 2006        | 654                                        | 15514                                         | 1028                                     | 17582                                       |
| 2007        | 548                                        | 14858                                         | 867                                      | 16750                                       |
| 2008        | 717                                        | 16675                                         | 998                                      | 19065                                       |
| 2009        | 737                                        | 15953                                         | 1125                                     | 18777                                       |
| 2010        | 647                                        | 14658                                         | 1129                                     | 18581                                       |
| 2011        | 627                                        | 15994                                         | 1037                                     | 19751                                       |
| 2012        | 810                                        | 13164                                         | 1135                                     | 17685                                       |
| 2013        | 845                                        | 13329                                         | 1175                                     | 18560                                       |
| 2014        | 770                                        | 12880                                         | 1275                                     | 18075                                       |
| 2015 Sep    | 640                                        | 10175                                         | 995                                      | 14420                                       |

**Table S4. Year wise utilization of combined aortic + mitral valve replacement in hospitalizations stratified by sex.**

| <b>Year</b> | <b>Combined AVR + MVR in females</b> | <b>No combined AVR+ MVR in females</b> | <b>Combined AVR + MVR in males</b> | <b>No combined AVR+ MVR in males</b> |
|-------------|--------------------------------------|----------------------------------------|------------------------------------|--------------------------------------|
| 2004        | 103                                  | 15064                                  | 272                                | 17347                                |
| 2005        | 93                                   | 14132                                  | 274                                | 17783                                |
| 2006        | 100                                  | 16068                                  | 365                                | 18244                                |
| 2007        | 89                                   | 15317                                  | 226                                | 17281                                |
| 2008        | 145                                  | 17246                                  | 329                                | 19734                                |
| 2009        | 164                                  | 16525                                  | 406                                | 19496                                |
| 2010        | 137                                  | 15169                                  | 433                                | 19277                                |
| 2011        | 128                                  | 16493                                  | 337                                | 20451                                |
| 2012        | 140                                  | 13834                                  | 325                                | 18495                                |
| 2013        | 170                                  | 14004                                  | 370                                | 19364                                |
| 2014        | 175                                  | 13475                                  | 370                                | 18980                                |
| 2015 Sep    | 110                                  | 10705                                  | 300                                | 15115                                |

**Table S5. Year wise Mortality in hospitalizations undergoing valve replacement surgery stratified by sex.**

| <b>Year</b> | <b>Mortality in hospitalizations undergoing valve replacement surgery, females</b> | <b>No mortality in hospitalizations undergoing valve replacement surgery, females</b> | <b>Mortality in hospitalizations undergoing valve replacement surgery, males</b> | <b>No mortality in hospitalizations undergoing valve replacement surgery, males</b> |
|-------------|------------------------------------------------------------------------------------|---------------------------------------------------------------------------------------|----------------------------------------------------------------------------------|-------------------------------------------------------------------------------------|
| 2004        | 148                                                                                | 815                                                                                   | 194                                                                              | 1873                                                                                |
| 2005        | 72                                                                                 | 771                                                                                   | 171                                                                              | 1786                                                                                |
| 2006        | 130                                                                                | 825                                                                                   | 215                                                                              | 1966                                                                                |
| 2007        | 135                                                                                | 655                                                                                   | 141                                                                              | 1719                                                                                |
| 2008        | 152                                                                                | 945                                                                                   | 169                                                                              | 2171                                                                                |
| 2009        | 95                                                                                 | 1100                                                                                  | 179                                                                              | 2203                                                                                |
| 2010        | 115                                                                                | 857                                                                                   | 154                                                                              | 2058                                                                                |
| 2011        | 62                                                                                 | 934                                                                                   | 152                                                                              | 2235                                                                                |
| 2012        | 100                                                                                | 1110                                                                                  | 130                                                                              | 2315                                                                                |
| 2013        | 85                                                                                 | 1165                                                                                  | 145                                                                              | 2475                                                                                |
| 2014        | 65                                                                                 | 1090                                                                                  | 135                                                                              | 2625                                                                                |
| 2015 Sep    | 75                                                                                 | 925                                                                                   | 125                                                                              | 2020                                                                                |

**Table S6. Year wise mortality in infective endocarditis hospitalizations stratified by sex.**

| <b>Year</b> | <b>Mortality in IE hospitalizations, females</b> | <b>No mortality in IE hospitalizations, females</b> | <b>Mortality in IE hospitalizations, males</b> | <b>No mortality in IE hospitalizations, males</b> |
|-------------|--------------------------------------------------|-----------------------------------------------------|------------------------------------------------|---------------------------------------------------|
| 2004        | 1189                                             | 13970                                               | 1450                                           | 16130                                             |
| 2005        | 1024                                             | 13150                                               | 1353                                           | 16683                                             |
| 2006        | 1073                                             | 15063                                               | 1421                                           | 17179                                             |
| 2007        | 947                                              | 1443                                                | 1159                                           | 16446                                             |
| 2008        | 1311                                             | 16062                                               | 1460                                           | 18578                                             |
| 2009        | 972                                              | 15713                                               | 1281                                           | 18613                                             |
| 2010        | 935                                              | 14366                                               | 1166                                           | 18495                                             |
| 2011        | 990                                              | 15582                                               | 1207                                           | 19535                                             |
| 2012        | 690                                              | 13280                                               | 1020                                           | 17780                                             |
| 2013        | 620                                              | 13544                                               | 1040                                           | 18670                                             |
| 2014        | 630                                              | 13005                                               | 1005                                           | 18330                                             |
| 2015 Sep    | 540                                              | 10270                                               | 755                                            | 14645                                             |

**Table S7. Predictors of cardiac valve replacement surgery in patients hospitalized with infective endocarditis from 2004-2015.**

| Characteristics (%)                    | Unadjusted                 | p-value          | Adjusted                   | p-value          |
|----------------------------------------|----------------------------|------------------|----------------------------|------------------|
| Mean age, years                        | 0.978 (0.977-9.979)        | <0.001           | 0.973 (0.971-0.974)        | <0.001           |
| Elective admission                     | 1.354 (1.276-1.436)        | <0.001           | 2.009 (1.866-2.164)        | <0.001           |
| <b>Female</b>                          | <b>0.540 (0.514-0.568)</b> | <b>&lt;0.001</b> | <b>0.586 (0.552-0.622)</b> | <b>&lt;0.001</b> |
| <i>Organisms/Microbiology</i>          |                            |                  |                            |                  |
| <i>Staphylococcus endocarditis</i>     | 0.858 (0.813-0.905)        | <0.001           | 0.755 (0.704-0.810)        | <0.001           |
| <i>Streptococcus endocarditis</i>      | 1.737 (1.653-1.825)        | <0.001           | 1.583 (1.472-1.701)        | <0.001           |
| <i>Gram negative endocarditis</i>      | 1.370 (1.258-1.490)        | <0.001           | 0.996 (0.888-1.116)        | 0.941            |
| <i>Enterococcus endocarditis</i>       | 0.964 (0.849-1.089)        | 0.56             |                            |                  |
| <i>Fungus endocarditis</i>             | 1.708 (1.366-2.114)        | <0.001           | 1.279 (0.969-1.669)        | 0.076            |
| <i>Risk factors and co-morbidities</i> |                            |                  |                            |                  |
| Drug abuse                             | 1.132 (1.068-1.199)        | <0.001           | 0.955 (0.885-1.030)        | 0.232            |
| Congenital heart disease               | 3.758 (3.474-4.061)        | <0.001           | 2.046 (1.846-2.265)        | <0.001           |
| Hepatitis C                            | 0.934 (0.868-1.003)        | 0.061            |                            |                  |
| Chronic rheumatic heart disease        | 2.405 (2.257-2.562)        | <0.001           | 1.986 (1.834-2.150)        | <0.001           |
| Infection of cardiac device/implant    | 1.805 (1.676-1.943)        | <0.001           | 1.548 (1.409-1.698)        | <0.001           |
| Prior valve replacement                | 0.244 (0.205-0.288)        | <0.001           | 0.303 (0.250-0.363)        | <0.001           |
| Prior PCI                              | 0.438 (0.350-0.540)        | <0.001           | 0.622 (0.480-0.795)        | <0.001           |
| Prior CABG                             | 0.274 (0.229-0.325)        | <0.001           | 0.376 (0.306-0.458)        | <0.001           |
| Congestive heart failure               | 1.917 (1.830-2.009)        | <0.001           | 1.917 (1.803-2.037)        | <0.001           |
| Cardiac arrhythmias                    | 1.524 (1.454-1.597)        | <0.001           | 1.805 (1.697-1.919)        | <0.001           |
| Atrial fibrillation                    | 1.046 (0.989-1.106)        | 0.114            |                            |                  |
| Coronary artery disease                | 0.741 (0.697-0.787)        | <0.001           | 1.264 (1.163-1.372)        | <0.001           |
| Liver cirrhosis                        | 0.636 (0.542-0.744)        | <0.001           | 0.500 (0.413-0.600)        | <0.001           |



|                                |                        |        |                     |        |
|--------------------------------|------------------------|--------|---------------------|--------|
| Coagulopathy                   | 2.245 (2.114-2.383)    | <0.001 | 1.609 (1.490-1.736) | <0.001 |
| DM controlled                  | 0.569 (0.530-0.612)    | <0.001 | 0.807 (0.739-0.881) | <0.001 |
| DM uncontrolled                | 0.575 (0.507-0.650)    | <0.001 | 0.672 (0.579-0.776) | <0.001 |
| HTN controlled                 | 0.565 (0.534-0.597)    | <0.001 | 0.975 (0.907-1.049) | 0.500  |
| HTN uncontrolled               | 0.864 (0.812-0.919)    | <0.001 | 0.816 (0.751-0.885) | <0.001 |
| Peripheral vascular disease    | 0.878 (0.793-0.970)    | 0.011  | 1.215 (1.075-1.370) | 0.001  |
| Smoking                        | 0.925 (0.830-1.027)    | 0.150  |                     |        |
| Solid tumor without metastasis | 0.358 (0.285-0.442)    | <0.001 | 0.525 (0.400-0.678) | <0.001 |
| Metastatic cancer              | 0.301 (0.210-0.417)    | <0.001 | 0.368 (0.235-0.553) | <0.001 |
| Malnutrition disorder          | 1.926 (1.792-2.069)    | <0.001 | 1.513 (1.381-1.656) | <0.001 |
| Cardiogenic shock              | 14.242 (12.659-16.035) | <0.001 | 7.811 (6.738-9.060) | <0.001 |
| Myocardial infarction          | 1.800 (1.628-1.986)    | <0.001 | 1.247 (1.096-1.415) | <0.001 |
| Mechanical ventilation         | 4.773 (4.397-5.179)    | <0.001 | 2.502 (2.248-2.783) | <0.001 |
| Blood transfusion              | 3.655 (3.480-3.838)    | <0.001 | 3.336 (3.141-3.544) | <0.001 |
| Acute stroke                   | 2.228 (2.077-2.389)    | <0.001 | 2.143 (1.959-2.341) | <0.001 |
| Race                           | 1.053 (1.030-1.077)    | <0.001 | 0.990 (0.964-1.016) | 0.456  |
| Hospital bed size              | 1.836 (1.765-1.911)    | <0.001 | 1.747 (1.667-1.832) | <0.001 |
| Hospital region                | 1.001 (0.979-1.024)    | 0.903  |                     |        |

**Figure S1. Trends in the mean length of stay for patients hospitalized with infective endocarditis stratified by sex.**

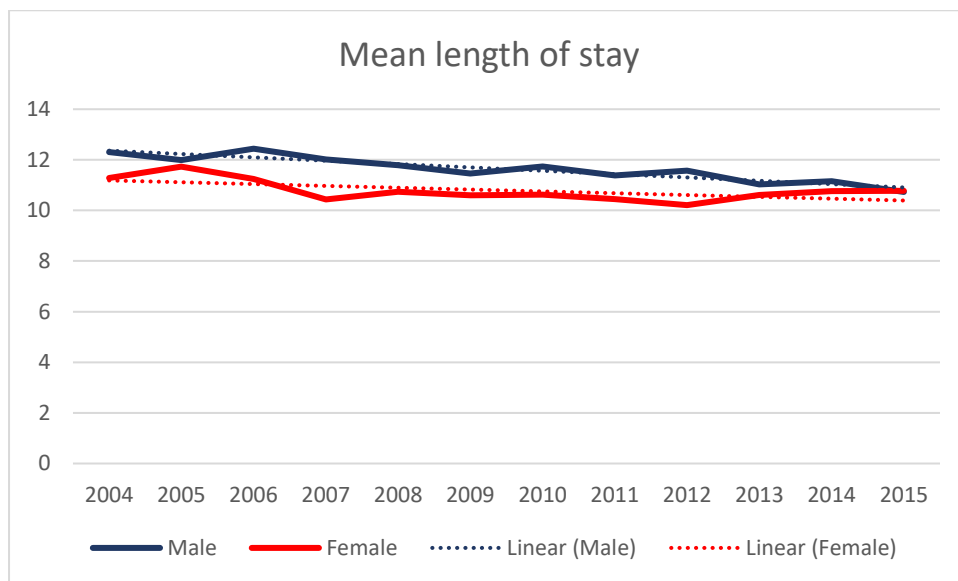

Supplement: JAH3-10-e020095-s001.pdf [file JAH3-10-e020095-s001.pdf]
